# Supplementary material for: Association of Common Variants in MMPs with Periodontitis Risk
Source: Dis Markers. 2016 Apr 19;2016:1545974. doi: 10.1155/2016/1545974 (PMC4853955; doi:10.1155/2016/1545974)
Supplement: Supplementary file 1 — Appendix S1: The Preferred Reporting Items for Systematic Review and Meta-Analyses (PRISMA) statement of our study. Appendix S2: The results of publication bias. Appendix S3: The results of sensitivity analysis. [file 1545974.f1.zip]

Archive with 4 entries (3 files):
- Suppl/
- Suppl/Appendix S1.doc
- Suppl/Appendix S2.doc
- Suppl/Appendix S3.doc
